# Supplementary material for: The effect of varying thicknesses of mineral trioxide aggregate (MTA) and Biodentine as apical plugs on the fracture resistance of teeth with simulated open apices: a comparative in vitro study
Source: PeerJ. 2024 Dec 18;12:e18691. doi: 10.7717/peerj.18691 (PMC11662899; doi:10.7717/peerj.18691)
Supplement: Supplemental Information 1 [file peerj-12-18691-s001.xlsx]

## Sheet: Sheet1
CONTROL GROUP
Sr. No.	Sample No.	Fracture Load(N)
1	No. 1	413.45
2	No. 2	462.36
3	No. 3	469.12
4	No. 4	436.78
5	No. 5	401.67
6	No. 6	475.23
7	No. 7	438.9
8	No. 8	352.5
9	No. 9	425.01
10	No. 10	439.87
	Average	431.489

## Sheet: Sheet2
GROUP I: 3 mm MTA apical plug
Sr. No.	Sample No.	Fracture Load(N)
1	No. 1	791.04
2	No. 2	718.76
3	No. 3	783.44
4	No. 4	844.17
5	No. 5	805.36
6	No. 6	810.93
7	No. 7	824.7
8	No. 8	794.83
9	No. 9	746.28
10	No. 10	629.22
	AVERAGE	774.87

## Sheet: Sheet3
GROUP II: 5 mm MTA apical plug
Sr. No.	Sample No.	Fracture Load(N)
1	No. 1	746.19
2	No. 2	861.81
3	No. 3	858.72
4	No. 4	813.32
5	No. 5	723.88
6	No. 6	624.45
7	No. 7	721.34
8	No. 8	710.69
9	No.9	759.01
10	No. 10	707.1
	AVERAGE	752.65

## Sheet: Sheet4
GROUP III: 3 mm Biodentine apical plug
Sr. No.	Sample No.	Fracture Load(N)
1	No. 1	974.19
2	No. 2	881.94
3	No. 3	850.13
4	No. 4	890.86
5	No. 5	872.21
6	No. 6	936.77
7	No. 7	880.37
8	No. 8	984.87
9	No. 9	1027.92
10	No. 10	883.24
	AVERAGE	918.25

## Sheet: Sheet5
GROUP IV: 5 MM Biodentine apical plug
Sr. No.	Sample No.	Fracture Load(N)
1	No. 1	890.32
2	No. 2	903.54
3	No. 3	922.5
4	No. 4	897.29
5	No. 5	875.54
6	No. 6	907.97
7	No. 7	913.74
8	No. 8	896.74
9	No. 9	956.17
10	No. 10	870.43
	AVERAGE	903.42
